# Supplementary material for: Synthesis of a semi-conductor-like MOF with black phosphorous as a composite for visible light-driven photocatalysis
Source: Royal Society of Chemistry journal article supplement (doi:10.1039/c9ra08296d), 2019-01-01
Supplement: c9ra08296d1.pdf [file c9ra08296d1.pdf]

**Supplementary Information**

**Synthesis of semi-conductor-like MOF with black phosphorous as a composite for visible light-driven photocatalyst**

Philani Vusumuzi Hlophe and Langelihle Nsikayezwe Dlamini\*

*Department of Chemical Sciences, University of Johannesburg, Doornfontein Campus, P.O. Box 17011, Doornfontein, Johannesburg, 2028, South Africa*

*\*Corresponding Author; Email: [lnlamini@uj.ac.za](mailto:lnlamini@uj.ac.za)*

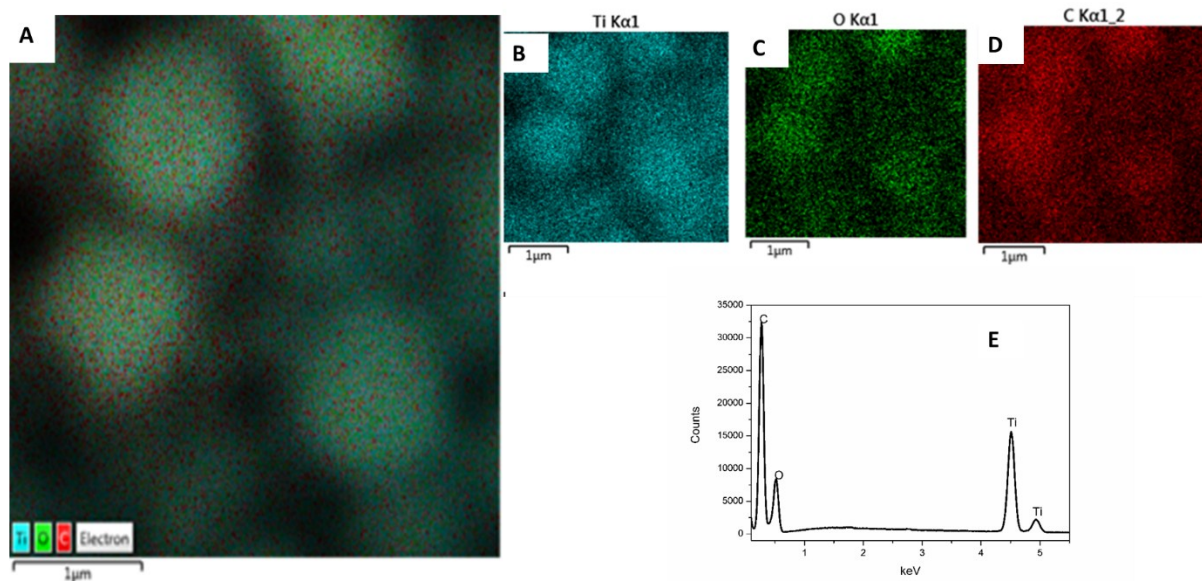

**Figure S1** SEM mapping image of MIL-125(Ti) with respective inserts of (B) Titanium, (C) Oxygen and (D) Carbon. (E) EDS of the mapped image.

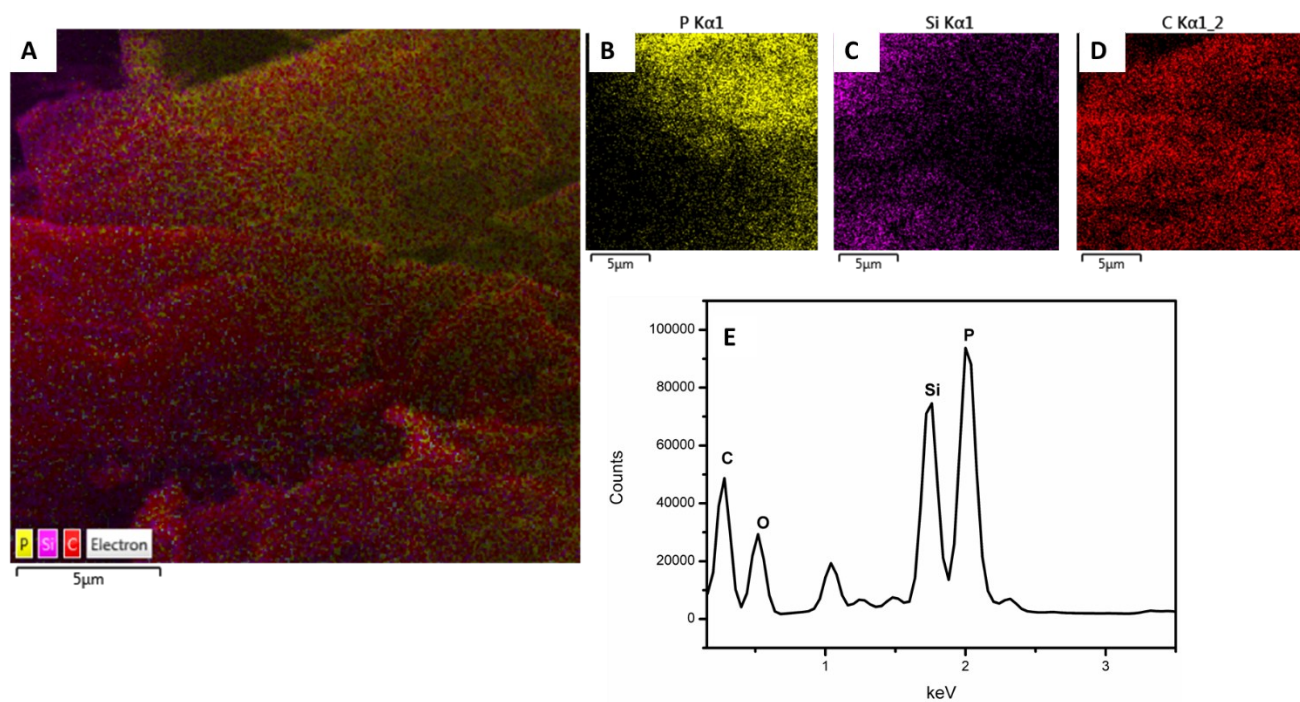

**Figure S2** (A) SEM image of FLBP with respective inserts of (B) Phosphorus (C) Silicon and (D) Carbon. (E) EDS of mapped image

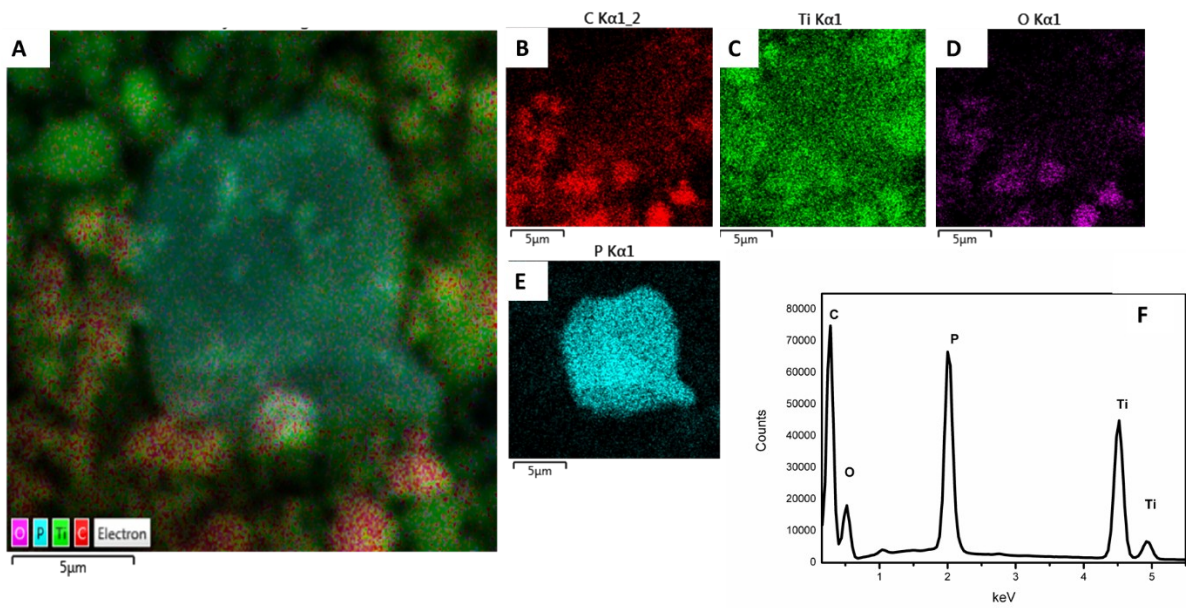

**Figure S3** (A) SEM mapping images of 12%BpMIL with respective inserts of (B) Carbon (C) Titanium (D) Oxygen and (E) Phosphorus. (F) EDS of mapped image

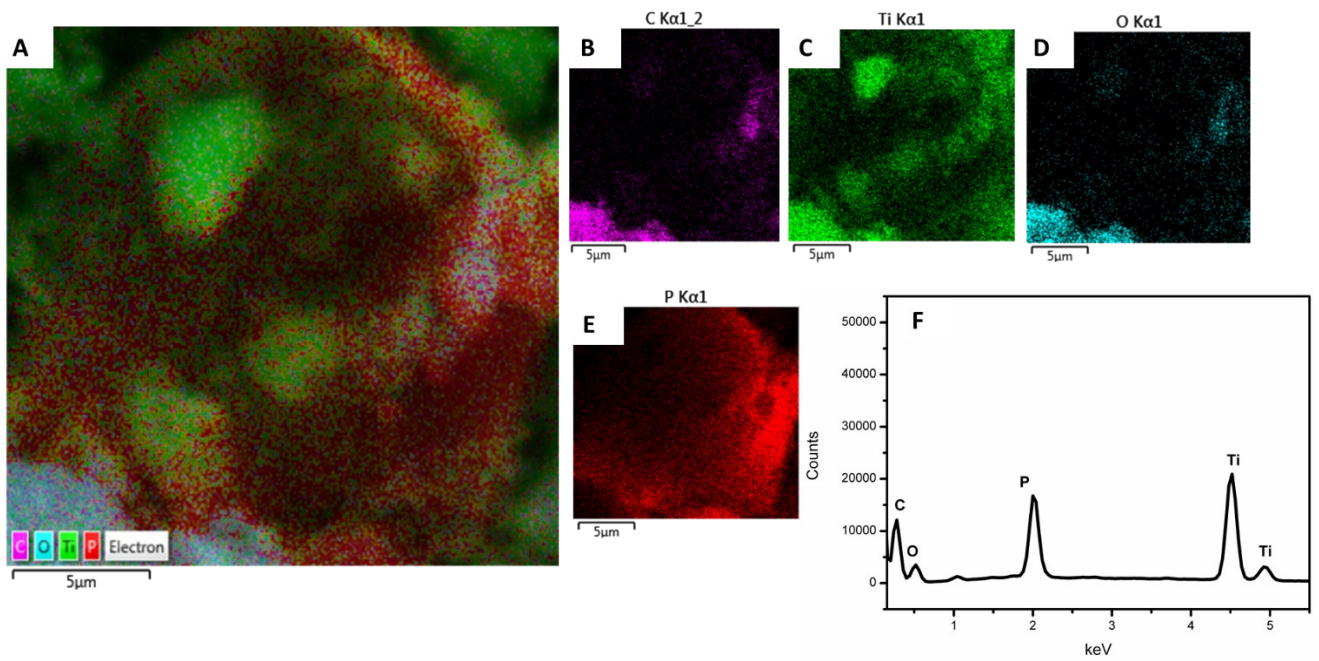

**Figure S4** (A) SEM mapping images of 6%BpMIL with respective inserts of (B) Carbon (C) Titanium (D) Oxygen and (E) Phosphorus. (F) EDS of mapped image

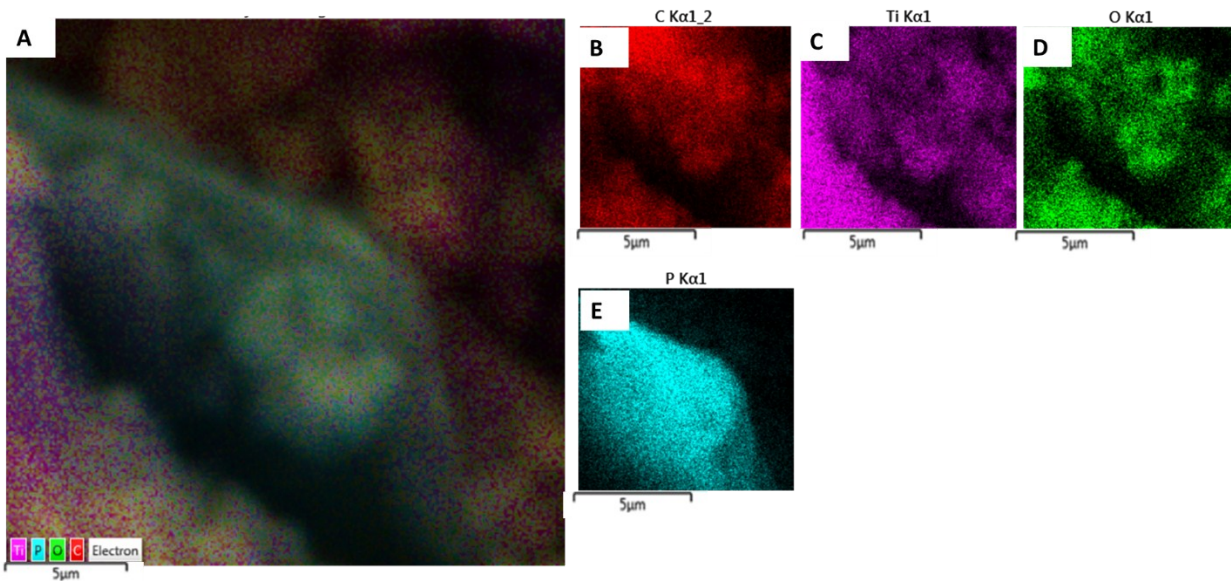

**Figure S5** (A) SEM mapping images of 4%BpMIL with respective inserts of (B) Carbon (C) Titanium (D) Oxygen and (E) Phosphorus. (F) EDS of mapped image

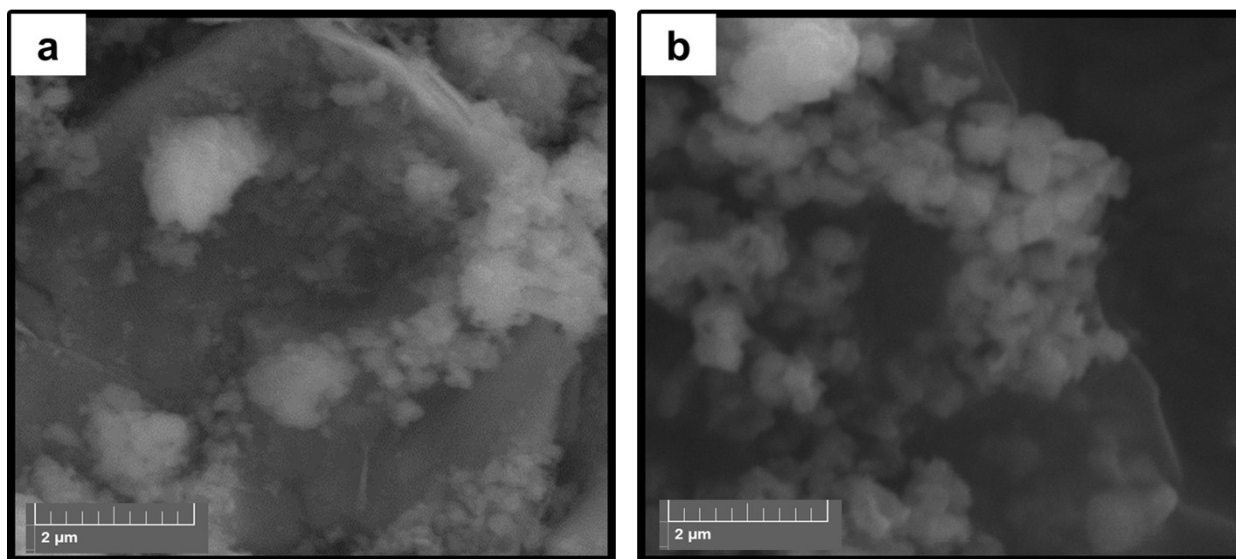

**Figure S6** SEM images of (a) 12%BpMIL and (b) 6% BpMIL

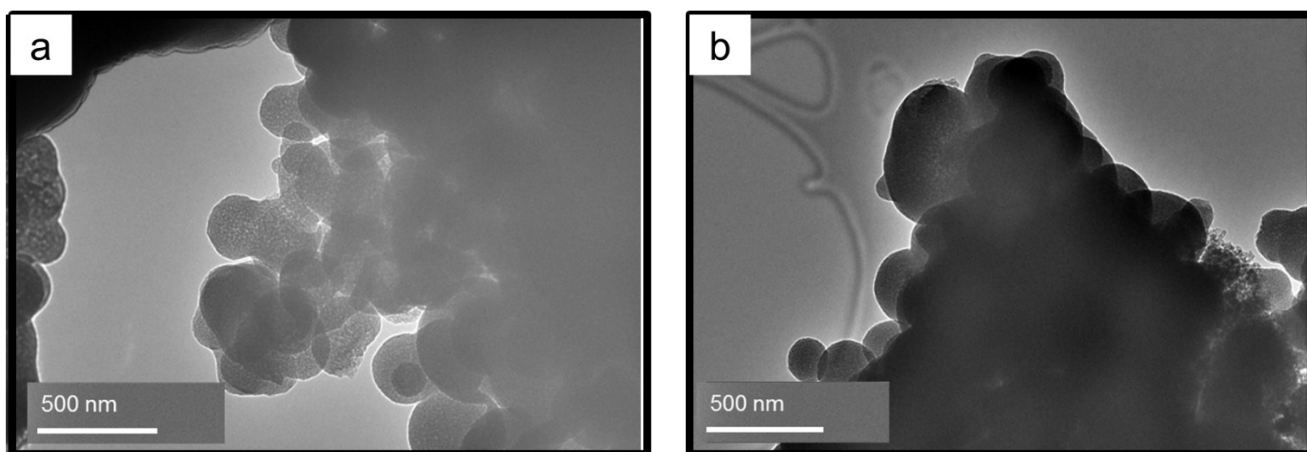

**Figure S7** TEM images of (a) 12%BpMIL and 6%BpMIL

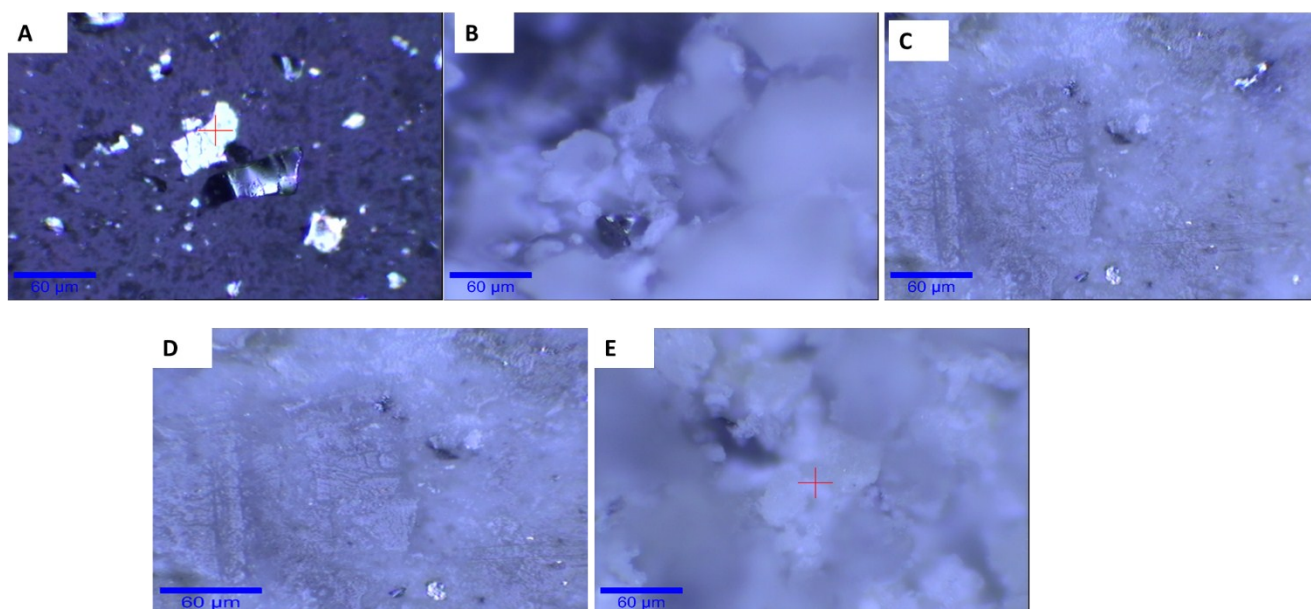

**Figure S8** Raman images of (A) FLBP (B) MIL-125(Ti) (C) 12%BpMIL (D) 6%BpMIL (E) 4%BpMIL

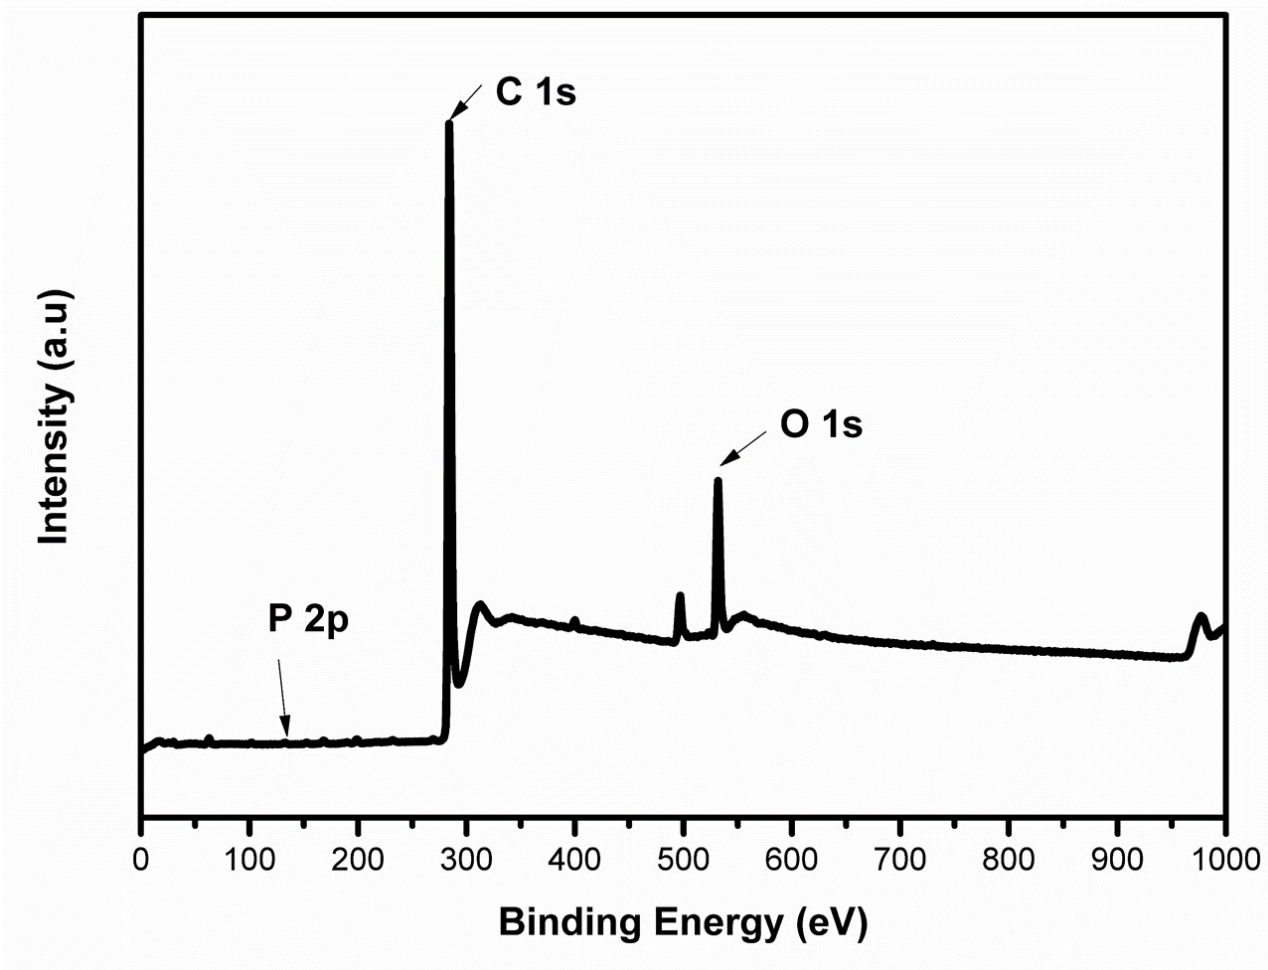

**Figure S9** XPS survey spectrum of FLBP

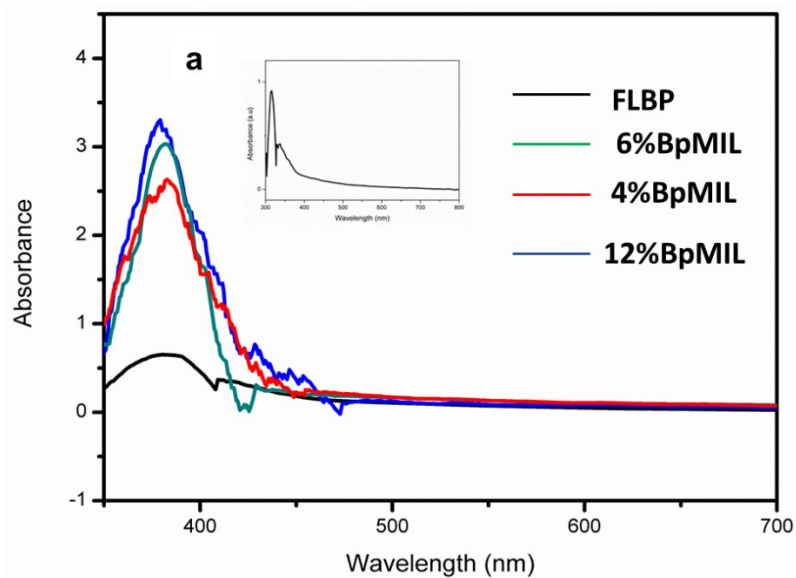

**Figure S10** UV DRS of nanocomposites

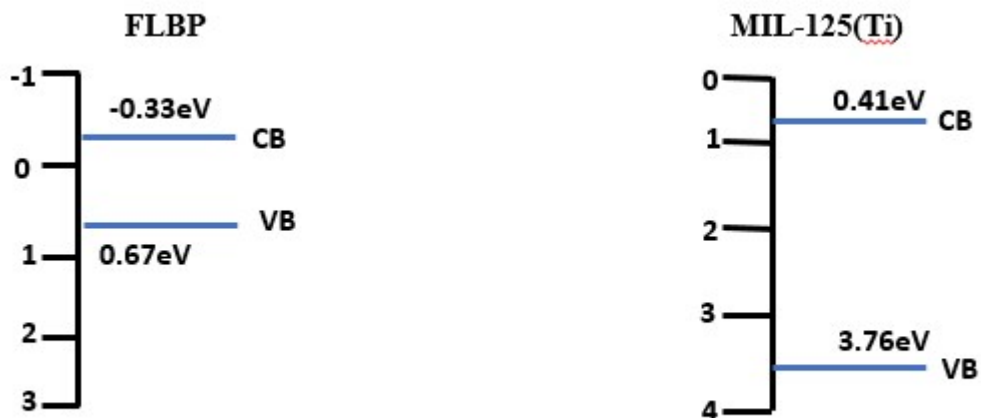

Figure S11 Band positions of FLBP and MIL-125(Ti)

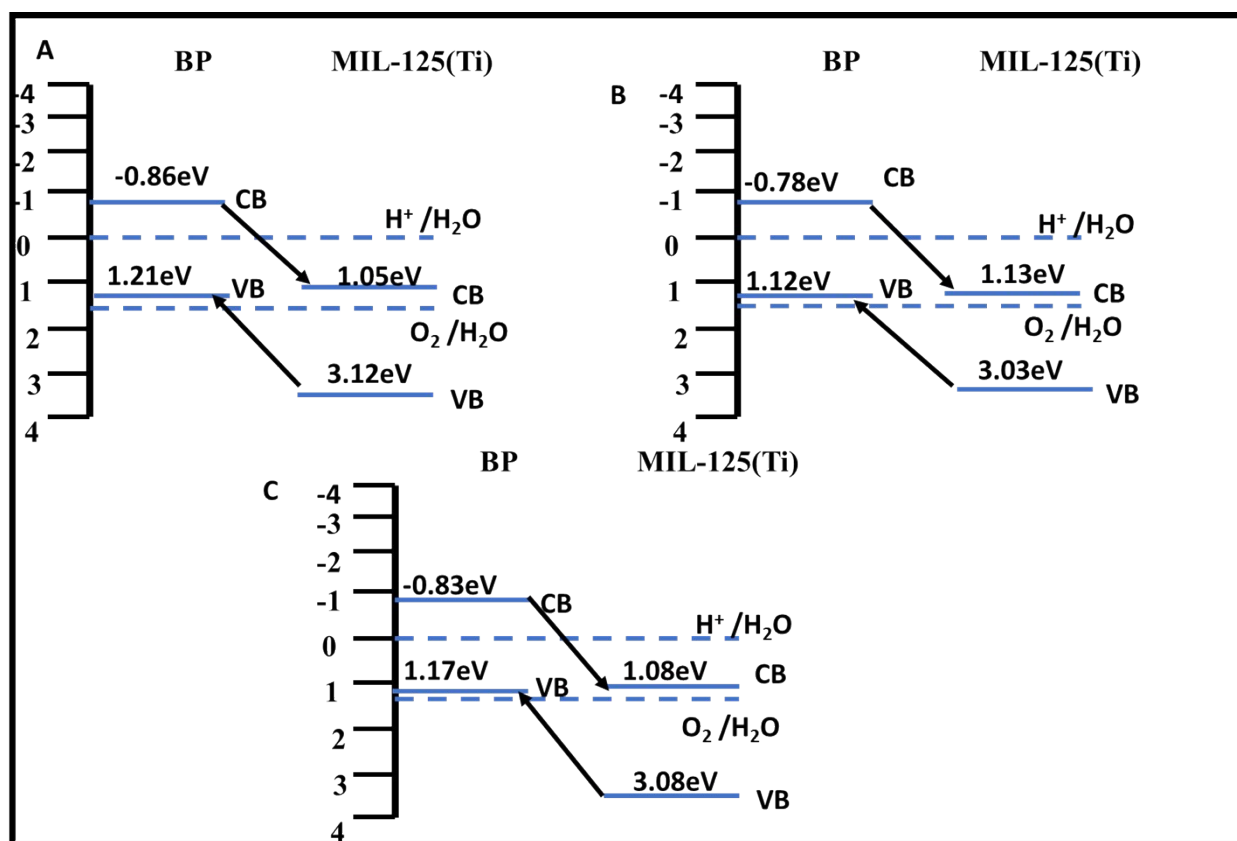

Figure S12 Band positions of (A) 12%BpMIL, (B) 6%BpMIL and (C) 4% BpMIL

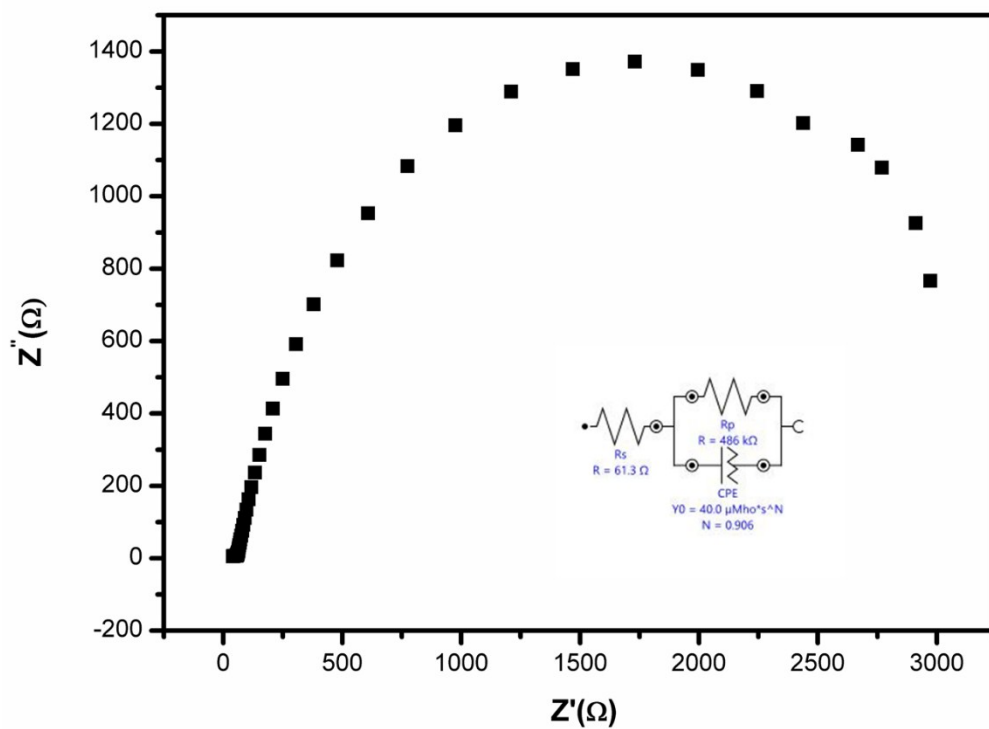

**Figure S13** Equivalent circuit and fitted Nyquist plots of MIL-125(Ti)

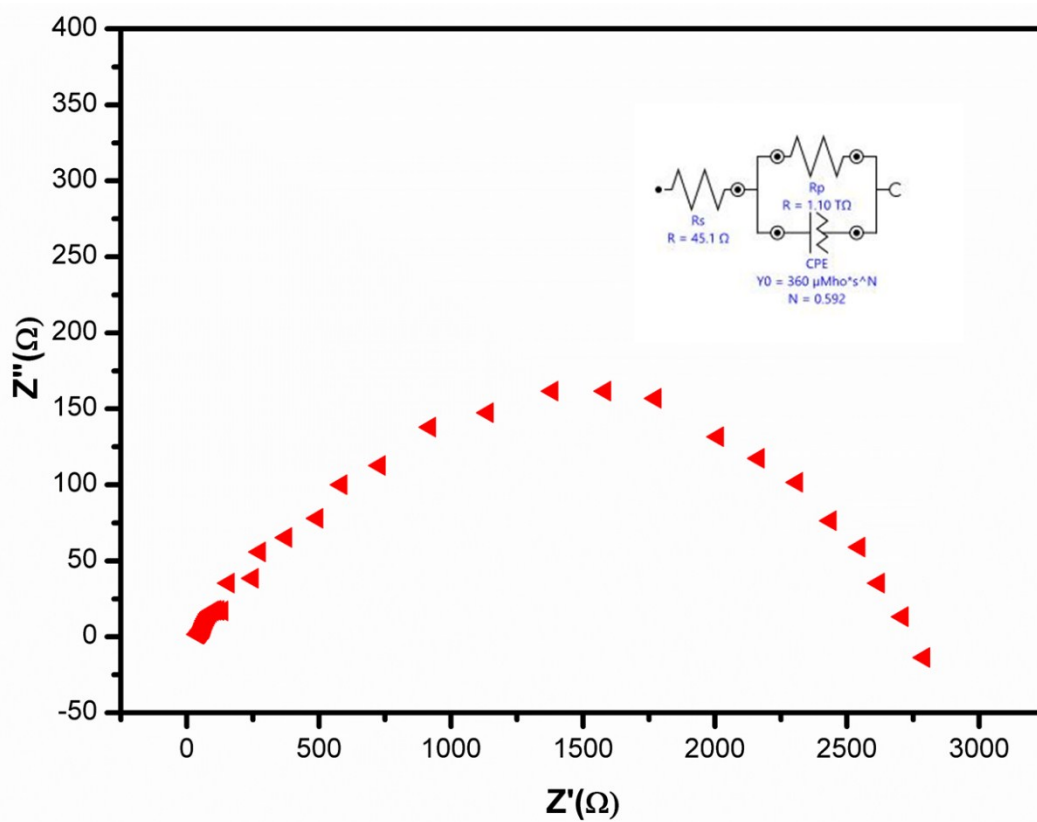

**Figure S14** Equivalent circuit and fitted Nyquist plots of FLBP



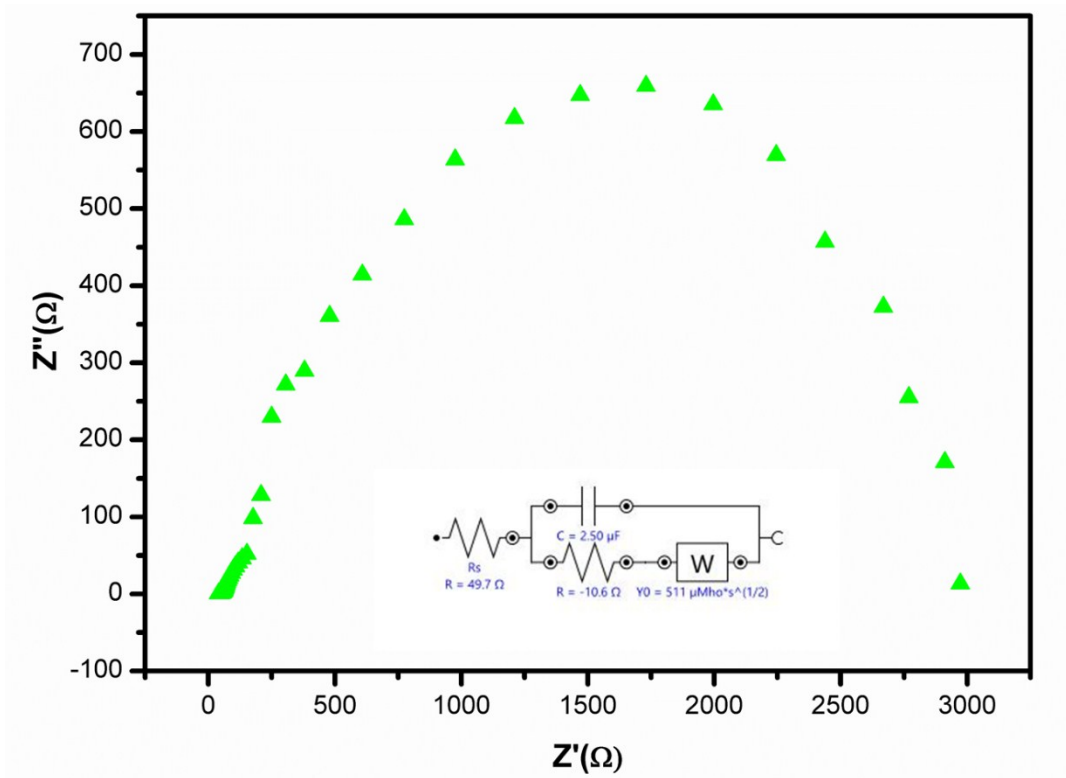

**Figure S15** Equivalent circuit and fitted Nyquist plots of 4%BpMIL

**Table S1:** Measurements of surface area, pore volume and pore size

| Photocatalyst name | $S_{\text{BET}}$ ( $\text{m}^2\text{g}^{-1}$ ) | Pore Volume ( $\text{cm}^3\text{g}^{-1}$ ) | Pore size (nm) |
|--------------------|------------------------------------------------|--------------------------------------------|----------------|
| MIL-125(Ti)        | 285                                            | 0.168                                      | 6.38           |
| 4%BpMIL            | 105                                            | 0.198                                      | 3.12           |
| 6%BpMIL            | 229                                            | 0.234                                      | 3.28           |
| 12%BpMIL           | 254                                            | 0.309                                      | 5.40           |
